# Supplementary material for: High copy wildtype human 1N4R tau expression promotes early pathological tauopathy accompanied by cognitive deficits without progressive neurofibrillary degeneration
Source: PubMed Central journal article supplement (PMC4453289; doi:10.1186/s40478-015-0210-6), 2015-06-04

### human Tau Copy Number

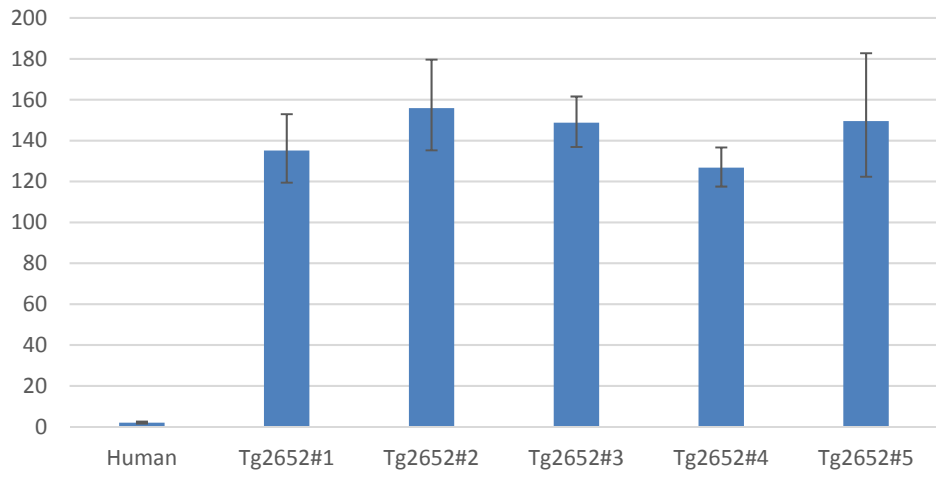

Supplement: 40478_2015_210_MOESM1_ESM.pdf [file 40478_2015_210_MOESM1_ESM.pdf]
